# Supplementary material for: Transmission of COVID-19 in 282 clusters in Catalonia, Spain: a cohort study
Source: bioRxiv or medRxiv preprint supplement (doi:10.1101/2020.10.27.20220277), 2020-12-23

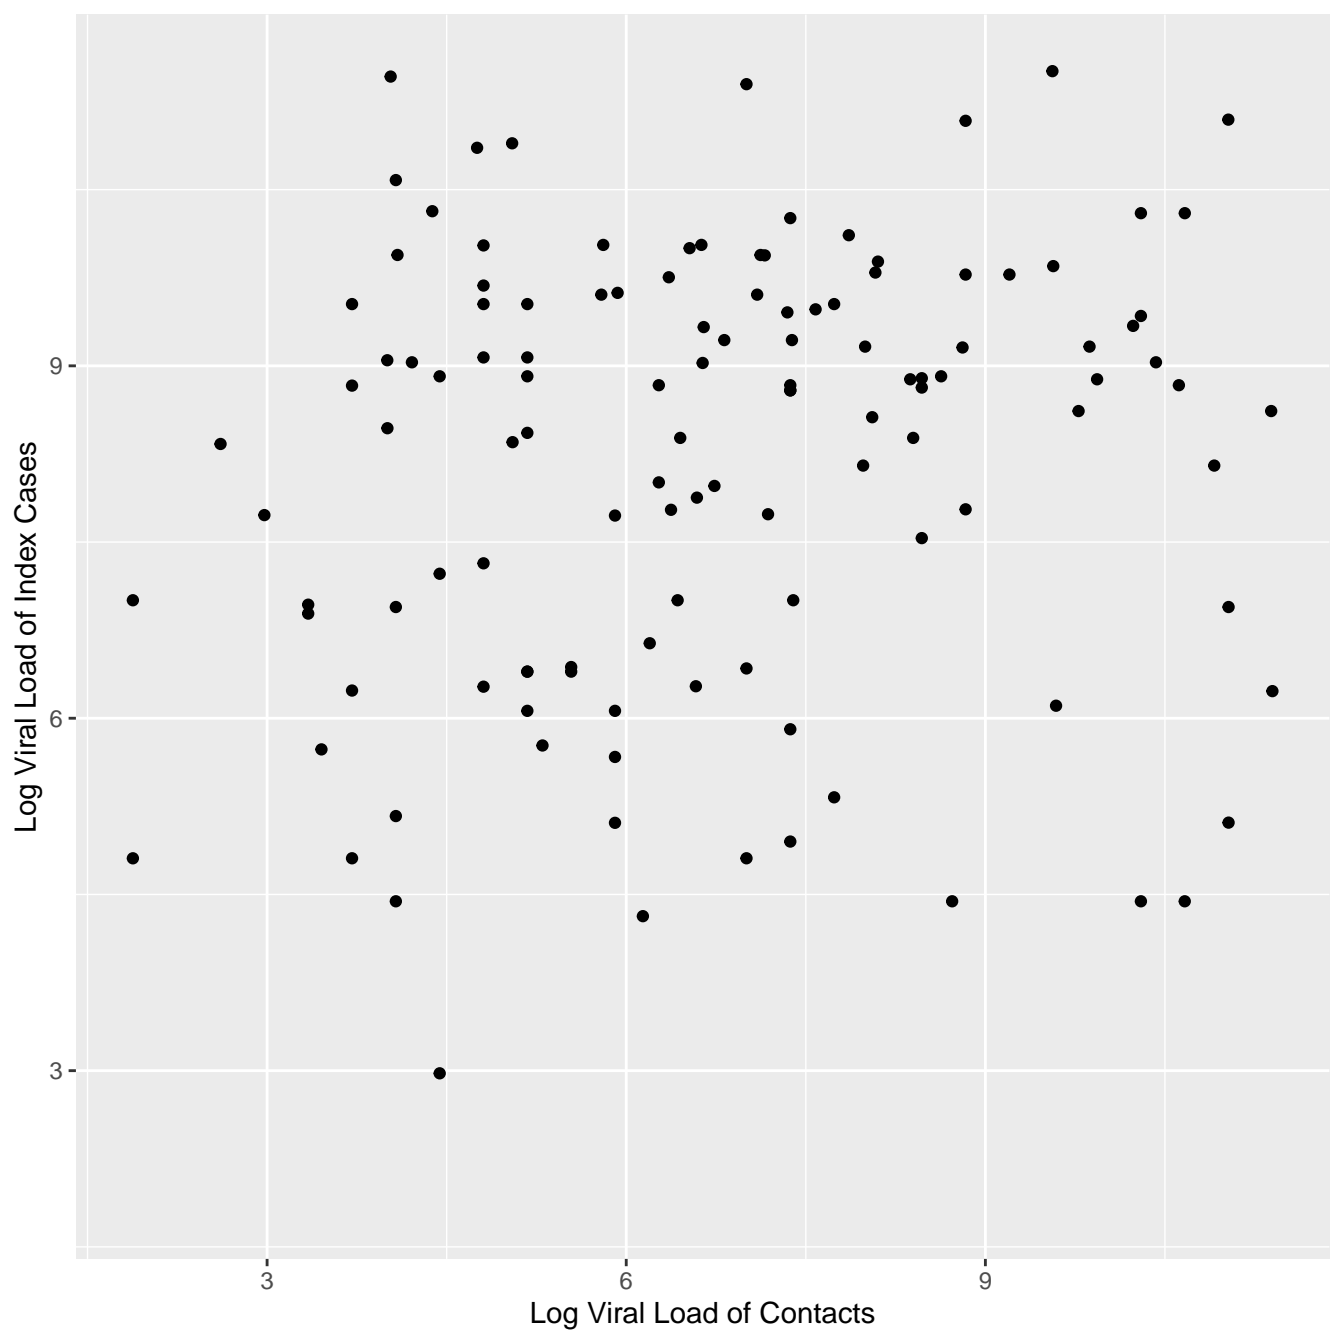

Supplement: Supplementary file [file media-1.pdf]
